# Supplementary material
Source: publisher site journal article supplement (http://kjim.org/upload/media/kjim-2021-308-suppl7.pdf)
Supplement: Supplementary file 1 [file kjim-2021-308-suppl7.pdf]

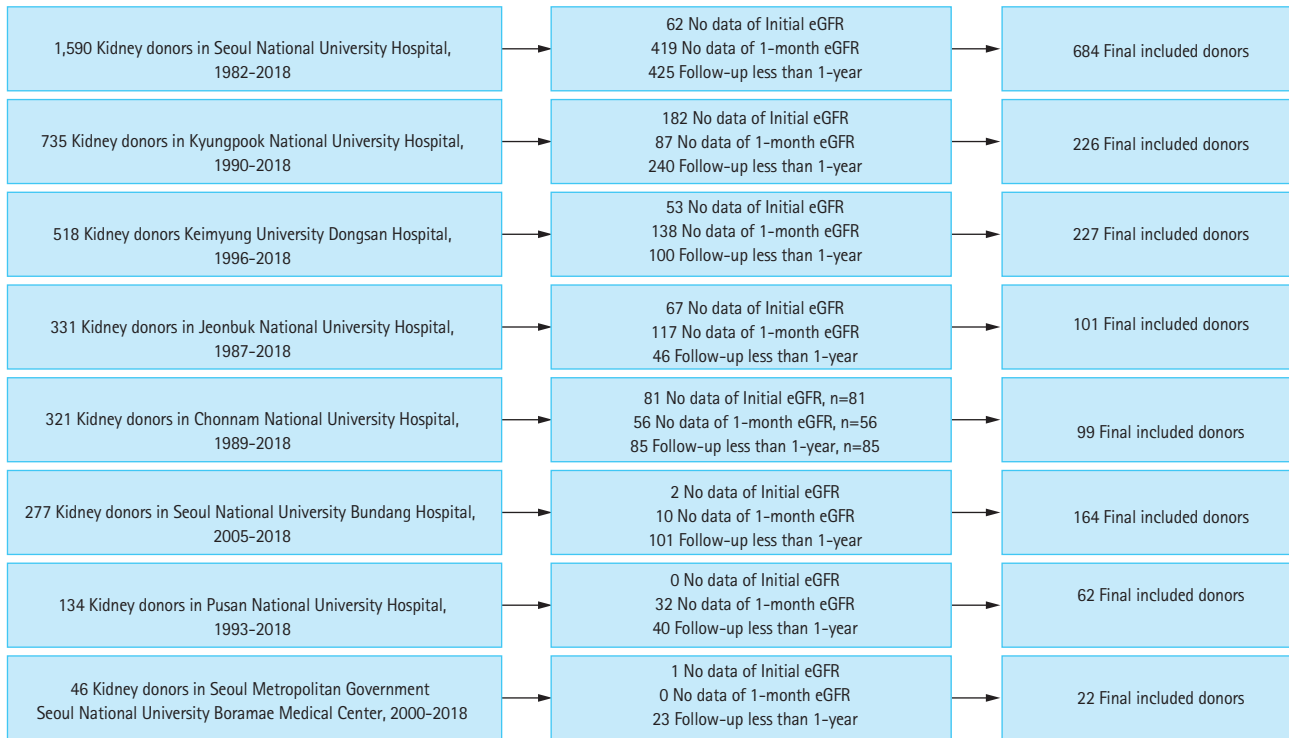

**Supplementary Figure 1.** Flow diagram of study population with exclusion criteria in each hospital. eGFR, estimated glomerular filtration rate.
